# Supplementary material for: A Comparative Study of Nutritional Status, Knowledge Attitude and Practices (KAP) and Dietary Intake between International and Chinese Students in Nanjing, China
Source: Int J Environ Res Public Health. 2018 Sep 3;15(9):1910. doi: 10.3390/ijerph15091910 (PMC6165259; doi:10.3390/ijerph15091910)
Supplement: Supplementary file 1 [file ijerph-15-01910-s001.pdf]

## Supplementary Material

# A Comparative Study of Nutritional Status, Knowledge Attitude and Practices (KAP) and Dietary Intake between International and Chinese Students in Nanjing, China

Ijaz ul Haq <sup>1</sup>, Zahula Mariyam <sup>1</sup>, Min Li <sup>2</sup>, Xiaojia Huang <sup>2</sup>, Pan Jiang <sup>1</sup>, Falak Zeb <sup>1</sup>, Xiaoyue Wu <sup>1</sup>, Qing Feng <sup>1,\*</sup> and Ming Zhou <sup>1,\*</sup>

<sup>1</sup> Department of Nutrition and Food Hygiene, Nanjing Medical University, Nanjing 211166, Jiangsu Province, China; ijaz@njmu.edu.cn (I.u.H.); mariyamzahul@gmail.com (Z.M.); jppanpan@njmu.edu.cn (P.J.); falak106@gmail.com (F.Z.); xiaoyuewu@njmu.edu.cn (X.W.)

<sup>2</sup> School of International Education, Nanjing Medical University, Nanjing 211166, China; minli@njmu.edu.cn (M.L.); shawn2006@163.com (X.H.)

\* Correspondence: qingfeng@njmu.edu.cn (Q.F.); mzhou78@163.com (M.Z.); Tel.: +86-25-86868412 (Q.F.)

**Table S1.** Description of students according to their country.

|                        | Country          | N   | %     |
|------------------------|------------------|-----|-------|
| International students | India            | 112 | 16.0  |
|                        | Sri Lanka        | 88  | 12.6  |
|                        | Thailand         | 46  | 6.6   |
|                        | USA              | 3   | .4    |
|                        | Ghana            | 19  | 2.7   |
|                        | Mauritius        | 9   | 1.3   |
|                        | Indonesia        | 13  | 1.9   |
|                        | Others countries | 18  | 2.6   |
| Chinese students       | China            | 393 | 56.1  |
|                        | Total            | 701 | 100.0 |

**Table S2.** Responses of international and Chinese students.

| KAP questions                                                                                                       | Correct responses | Rate (%)               |                  |
|---------------------------------------------------------------------------------------------------------------------|-------------------|------------------------|------------------|
|                                                                                                                     |                   | International students | Chinese students |
| Knowledge                                                                                                           |                   |                        |                  |
| Nutritional value of food depends on its cooking pattern                                                            | T                 | 75.5                   | 66.6             |
| Nutritious food means the food has high calories                                                                    | F                 | 69.4                   | 93.9             |
| All men and women require the same amount of calories                                                               | F                 | 80.0                   | 87.6             |
| A balanced diet which is important for life contain adequate energy and nutrients required                          | T                 | 89.7                   | 86.5             |
| If a food has a lot of proteins and lipids, there is no need to consume food with carbohydrates like rice and wheat | F                 | 70.0                   | 84.0             |
| We need to use lipids even if someone is obese                                                                      | T                 | 44.8                   | 93.7             |
| Attitude                                                                                                            |                   |                        |                  |
| I believe that unhealthy eating habits causes obesity                                                               | Agree             | 81.6                   | 98.0             |

**Table S2.** *Cont.*

|                                                                                        |            |      |      |
|----------------------------------------------------------------------------------------|------------|------|------|
| I believe that high intake of sugar-sweetened beverages leads to unhealthy weight gain | Agree      | 87.1 | 95.7 |
| Practice                                                                               |            |      |      |
| Calculation of body mass index (BMI)                                                   | Practicing | 54.2 | 73.4 |
| Taking of breakfast (7day/week)                                                        | Practicing | 25.5 | 51.5 |

---

T=true, F=false
